# Supplementary material for: Electronic interactions between a quaternary pyridyl-β-diketonate and anionic clay nanosheets facilitate intense photoluminescence
Source: Royal Society of Chemistry journal article supplement (doi:10.1039/d0pp00166j), 2020-07-20
Supplement: d0pp00166j1.pdf [file d0pp00166j1.pdf]

## ***Electronic Supplementary Information (ESI)***

### **Electronic Interactions between A Quaternary Pyridyl- $\beta$ -diketonate and Anionic Clay Nanosheets Facilitates Intense Photoluminescence**

**by**

Tomohiko Okada,<sup>a,b\*</sup> Yoko Miyamoto,<sup>b</sup> Haruka Kurihara,<sup>b</sup>  
Yoshifumi Mochiduki,<sup>c</sup> Shiho Katsumi,<sup>c</sup> and Fuyuki Ito<sup>c</sup>

<sup>a</sup> Research Initiative for Supra-Materials, Shinshu University, 4-17-1, Wakasato, Nagano 380-8553, Japan

<sup>b</sup> Department of Chemistry and Material Engineering, Faculty of Engineering, Shinshu University, 4-17-1, Wakasato, Nagano 380-8553, Japan

<sup>c</sup> Institute of Education, Shinshu University, 6-ro, Nishinagano, Nagano 380-8544, Japan

\* E-mail: [tomohiko@shinshu-u.ac.jp](mailto:tomohiko@shinshu-u.ac.jp)

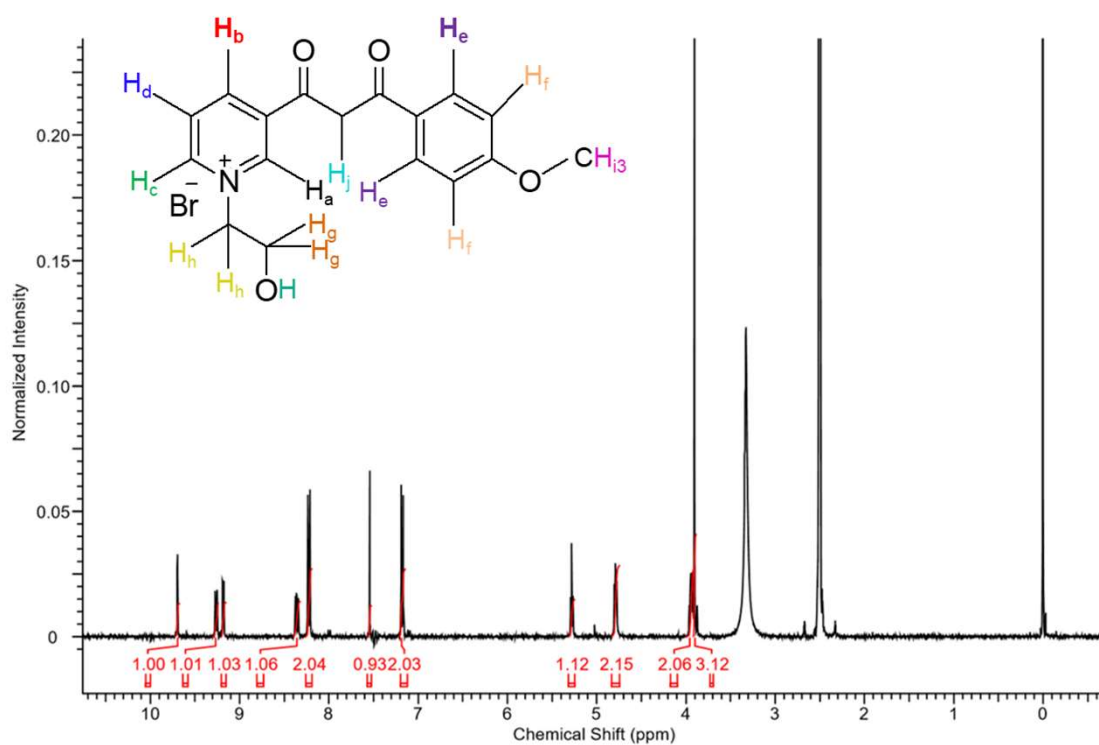

**Fig. S1.**  $^1\text{H}$  NMR spectrum of BDKPy $^+\text{Br}^-$ .

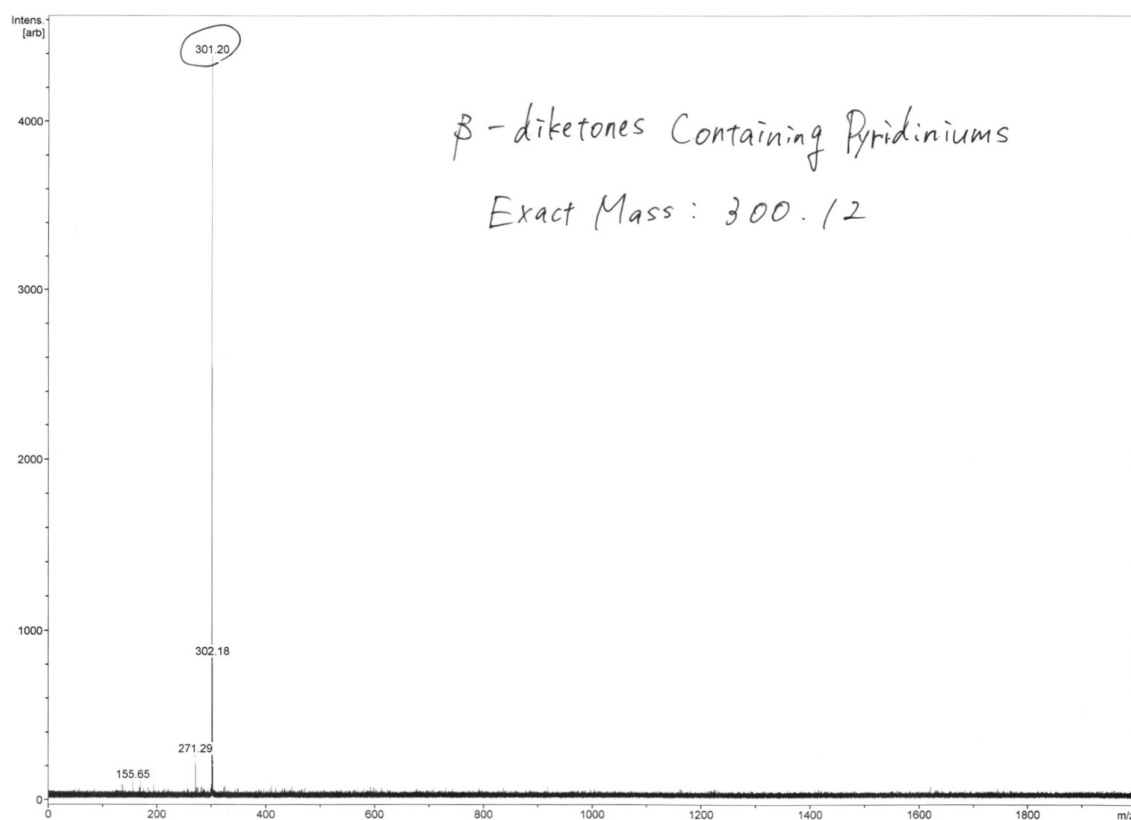

**Fig. S2.** MS spectrum of BDKPy<sup>+</sup>Br<sup>-</sup>.

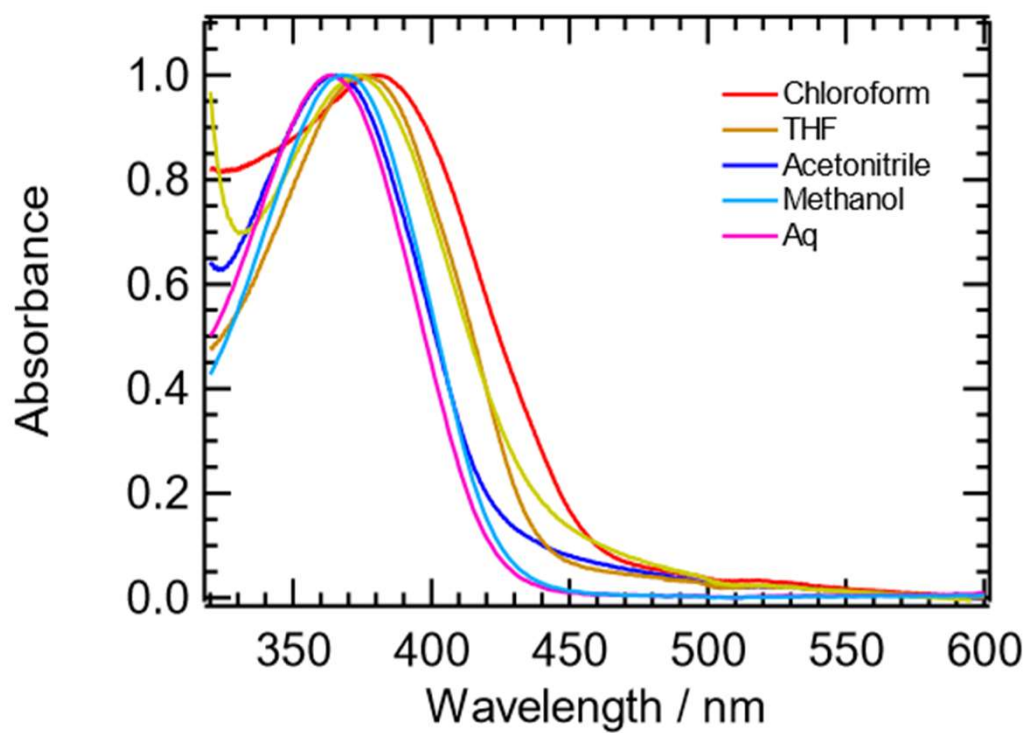

**Fig. S3.** Absorption spectra of BDKPy<sup>+</sup>Br ( $1.0 \times 10^{-2}$  mM) in water, methanol, acetonitrile, tetrahydrofuran, and chloroform.

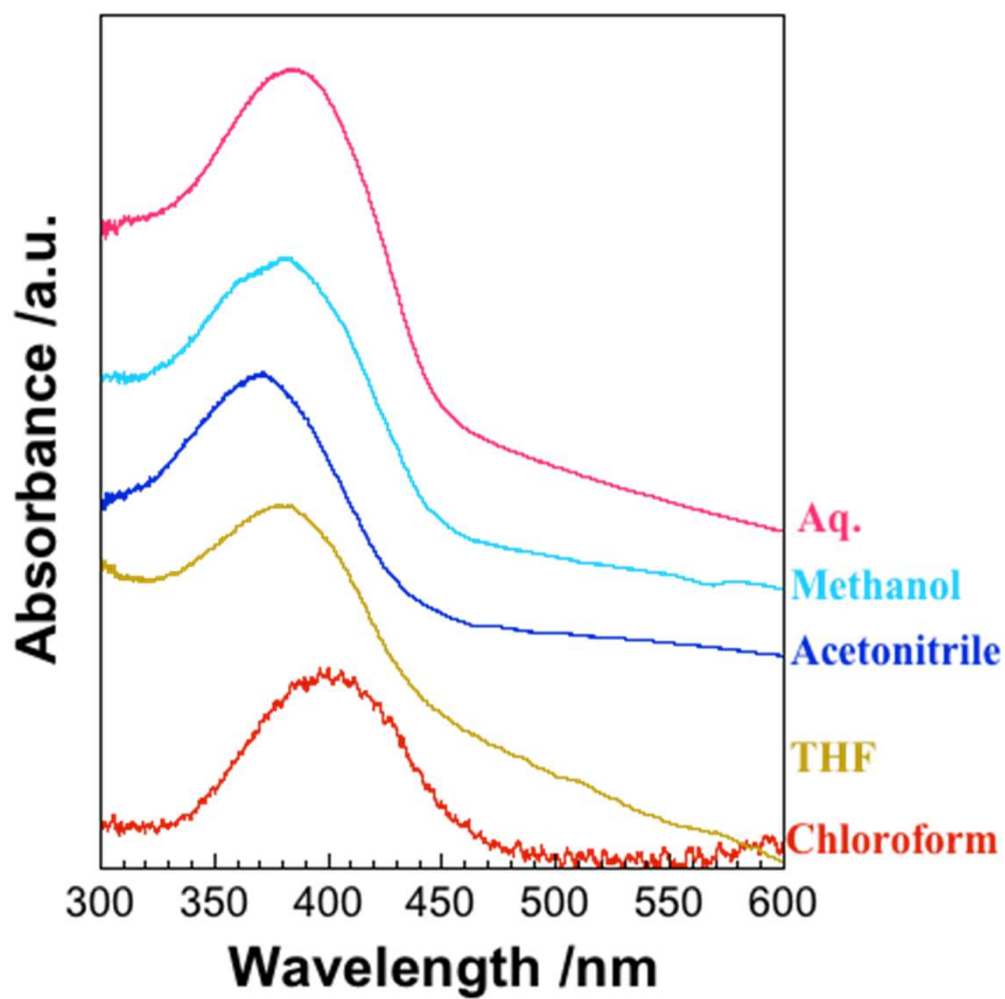

**Fig. S4.** Absorption spectra of BDKPy<sup>+</sup>-S0.1 in water, methanol, acetonitrile, tetrahydrofuran, and chloroform.

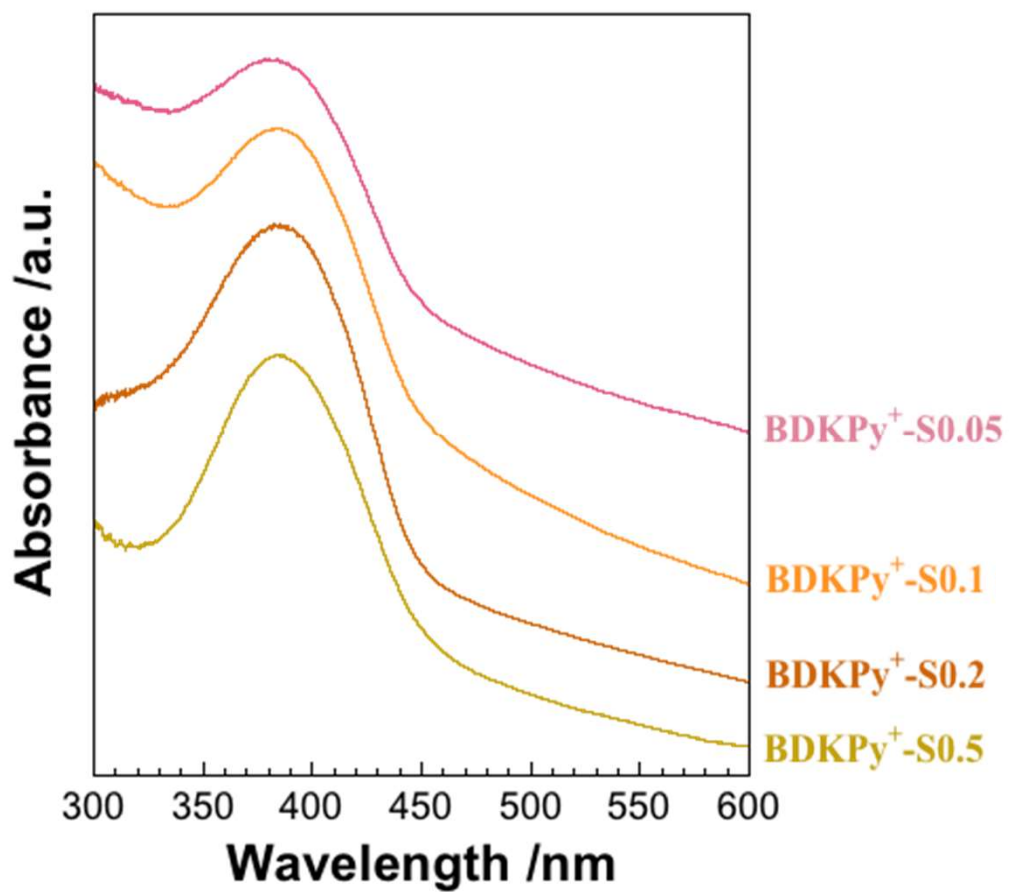

**Fig. S5.** Absorption spectra of BDKPy<sup>+</sup>-*Sn* in the water/ethanol mixture.

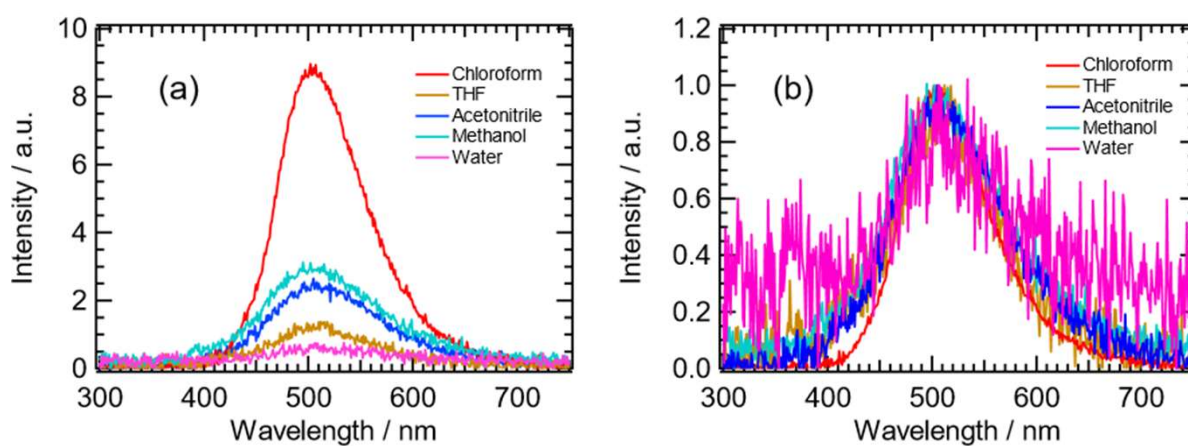

**Fig. S6.** (a) Photoluminescence ( $\lambda_{\text{ex}} = 365$  nm) spectra of BDKPy<sup>+</sup>Br ( $1.0 \times 10^{-2}$  mM) in water, methanol, acetonitrile, tetrahydrofuran, and chloroform. Part (b) is the normalized spectrum of (a).

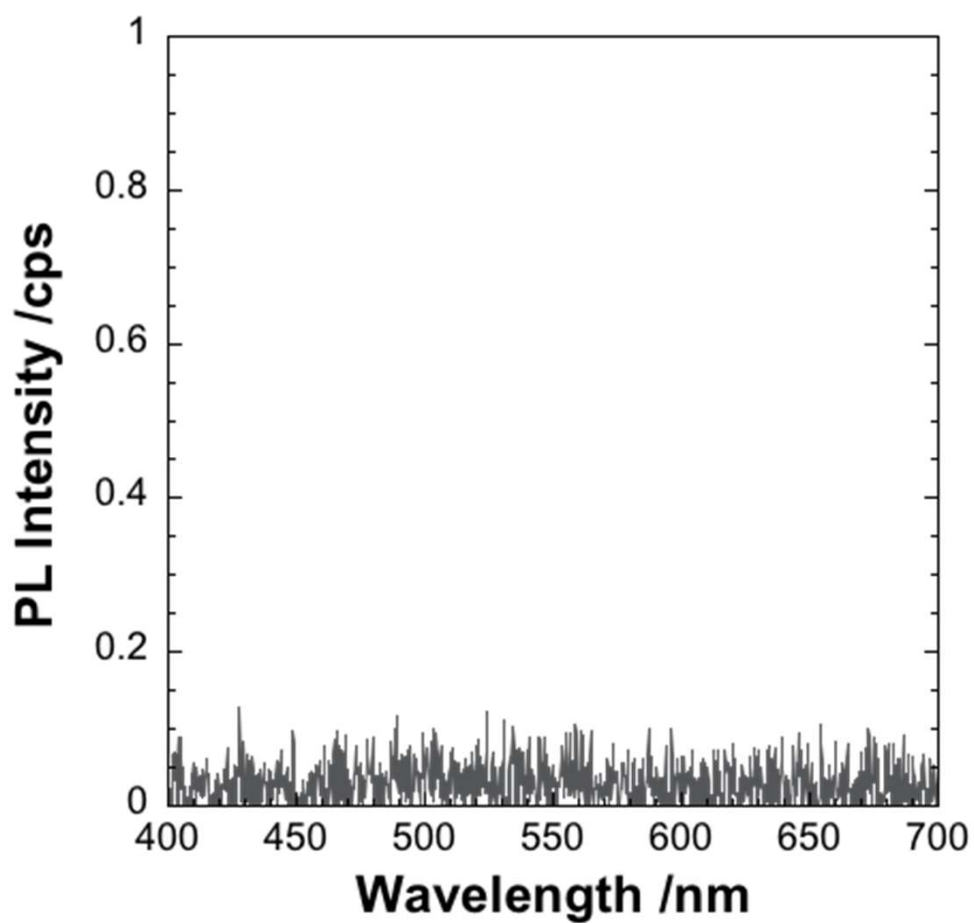

**Fig. S7.** Photoluminescence ( $\lambda_{\text{ex}} = 365$  nm) spectrum of mixed solution (water/ethanol = 9:1) of BDKPy<sup>+</sup>Br ( $1.0 \times 10^{-2}$  mM).



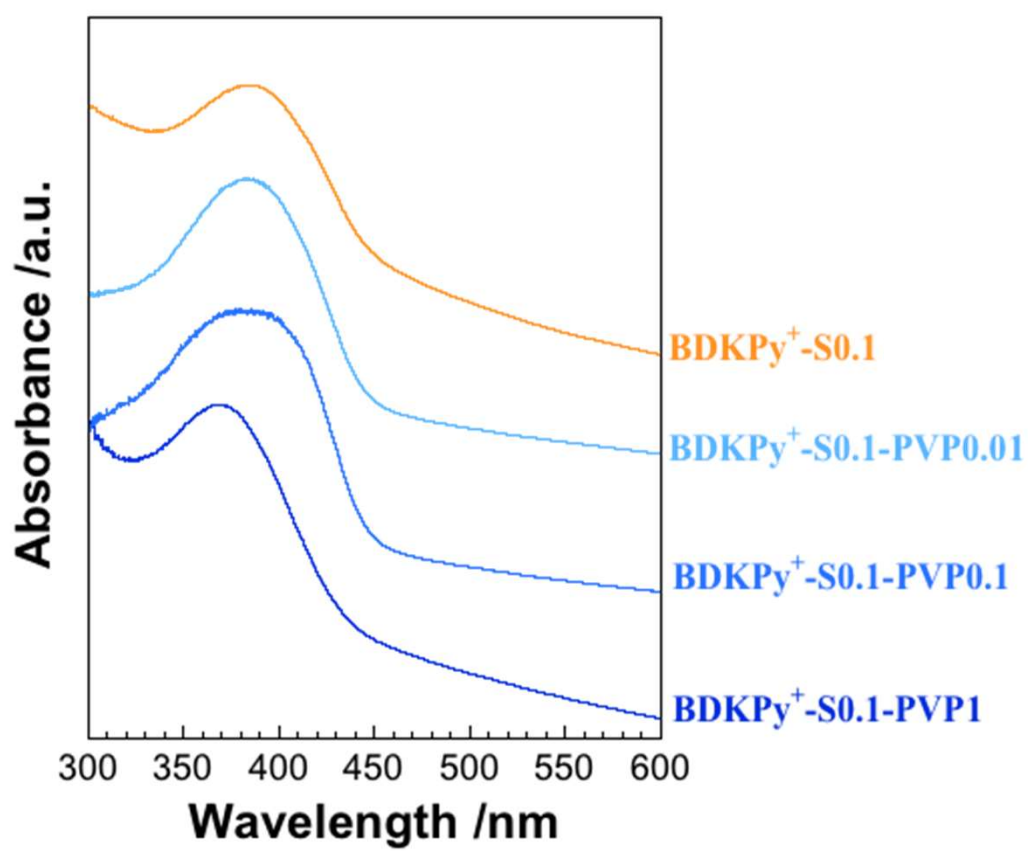

**Fig. S8.** Absorption spectra of BDKPy<sup>+</sup>-S0.1-PVP $n$  in the water/ethanol mixture.
